# Supplementary material for: STRIPAK, a Key Regulator of Fungal Development, Operates as a Multifunctional Signaling Hub
Source: MDPI journal article supplement (doi:10.3390/jof7060443), 2021-06-01
Supplement: s1 [file s1]

**Supplementary material – to Perspective submitted to Journal of Fungi.**

**STRIPAK, a key regulator of fungal development, operates as a multifunctional signaling hub**

Ulrich Kück<sup>1#</sup> and Valentina Stein<sup>1</sup>

<sup>1</sup>Allgemeine und Molekulare Botanik, Faculty for Biology and Biotechnology, Ruhr-University, 44780 Bochum, Germany

<sup>#</sup>Corresponding author: [ulrich.kueck@rub.de](mailto:ulrich.kueck@rub.de)

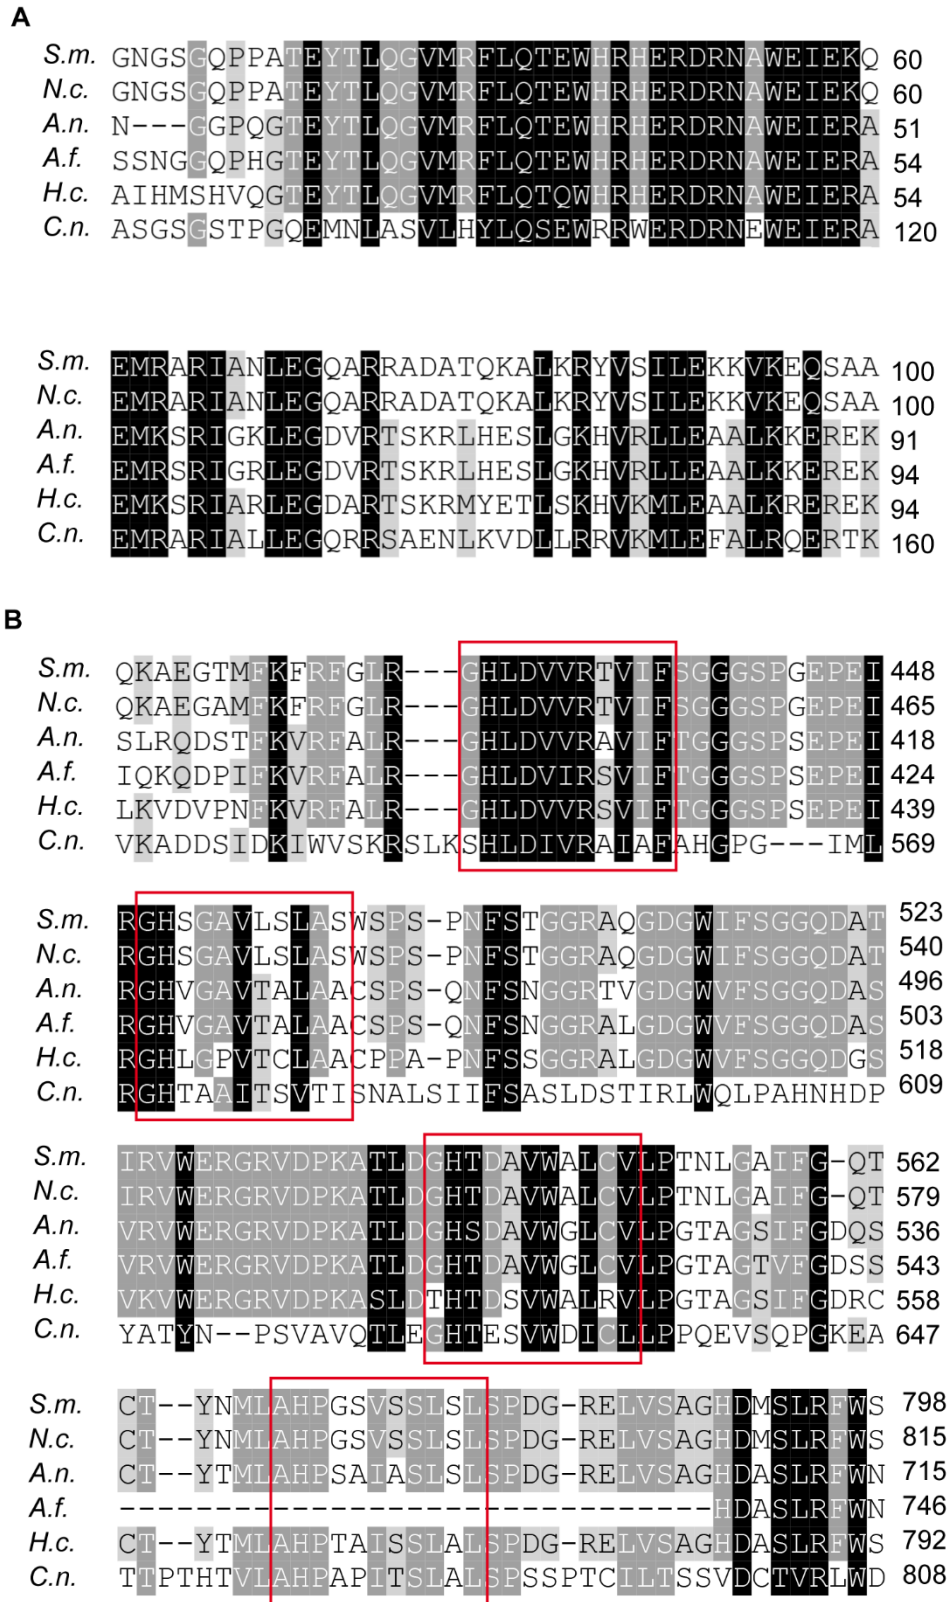

**Figure S1: Alignment of striatin homologues in selected fungi.** (A) Coiled-coil domain. (B) Examples of WD40 domains are framed in red. Consensus sequence of WD40 domain is (G/S/A/V)HxxxΦxx(Φ/S). X, any amino acid; Φ, any hydrophobic residue (1-3). Numbers indicate number of the last amino acid of each row. *S.m.*, *Sordaria macrospora*; *N.c.*, *Neurospora crassa*; *A.n.*, *Aspergillus nidulans*; *A.f.*, *Aspergillus fumigatus*; *H.c.*, *Histoplasma capsulatum*; *C.n.*, *Cryptococcus neoformans*.

**A**

```

S.m. KTISVPFYFPDIMKIGRQTNAKTVPLPTNGFFDSKVLSRQHAEIWAN-QDGKIYIKDVKSSNGTFVNGNRLS 286
N.c. KTISVPFYFPDIMKIGRQTNAKTVPLPTNGFFDSKVLSRQHAEIWAN-QDGKIFIKDVKSSNGTFVNGNRLS 287
A.n. KQITLPPYFPETLRIGRQTNAKTVPTSKNGFFDSKVLSRQHAEIWADRATGKVLIRDVKSSNGTFLNGQRLS 246
A.f. KQITVPFYFPEVLRIGRQTNAKTVPTPVNGFFDSKVLSRQHAEIWAD-KSGKIWIRDVKSSNGTFVNGQRLS 194
H.c. KQITVPFYFPEVLRVGRQTNAKTVPTPVNGYFDSKVLSRQHAEVWAD-RAGKIWIRDVKSSNGTFVNGQRLS 248
C.n. RRMGGDMHPGANPLAQMGPAMMSGG---GKVGSLSEFHVLSKLAELHASKETGAELQNLATFTGTGIQDTL 257
C.a. KHLIPVATYPETTKLGRPTGTGFKPDVTNGYFDSRVLSRNHAQIYIDPKNGKLMIQDLGSSNGTYLNEVRLS 278

```

**B**

```

S.m. YVSVLGVVLLIGMGMMAYLNGWQPQAKN- 796
N.c. YVSVLGVVFIIGMGLMAYLNGWQPQAKN- 797
A.n. LASMLGVVLLGVGLMAYLNGWQKMDK-- 746
A.f. YASMLGVVLLGVGLMAYLNGWQKMDK-- 741
H.c. YASMLGVVLLGVGIMAYLNGWQRGDK-- 760
C.n. VVQPQTVVGVLVVAIVVGAFWYKHKE-- 777
C.a. EIDKQKLQTALIAMSAIIGYYLQRLTN 869

```

**Figure S2: Alignment of SLMAP homologues in selected fungi.** (A) fork-head associated (FHA) domain. (B) Transmembrane domain. Numbers indicate number of the last amino acid of each row. *S.m.*, *Sordaria macrospora*; *N.c.*, *Neurospora crassa*; *A.n.*, *Aspergillus nidulans*; *A.f.*, *Aspergillus fumigatus*; *H.c.*, *Histoplasma capsulatum*; *C.n.*, *Cryptococcus neoformans*.

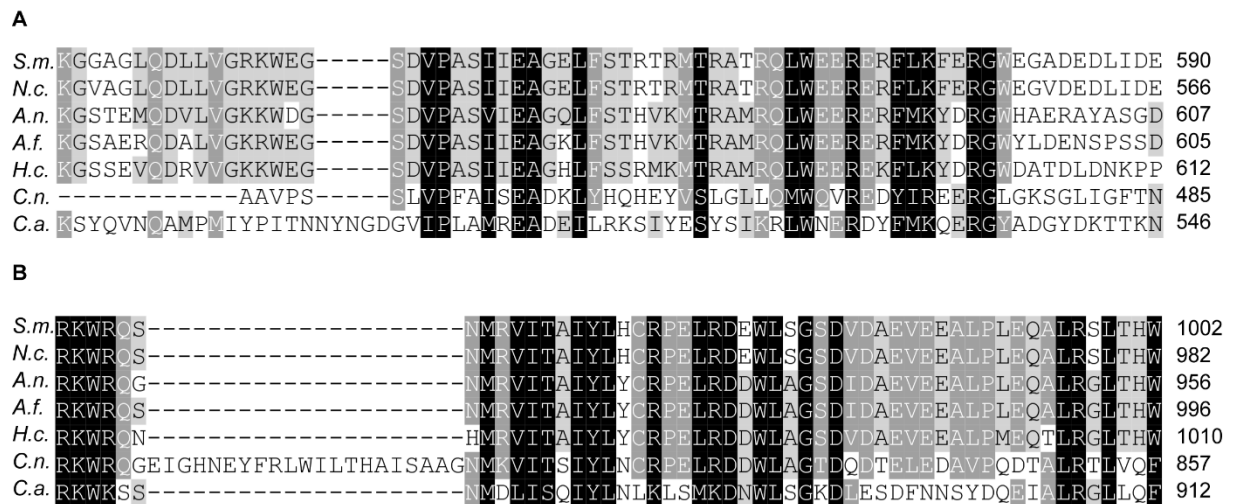

**Figure S3: Alignment of STRIP1/2 homologues in selected fungi.** (A) N- and (B) C-terminal part of the DUF3402 domain, which is characteristically found in STRIP1/2 homologues. Numbers indicate number of the last amino acid of each row. *S.m.*, *Sordaria macrospora*; *N.c.*, *Neurospora crassa*; *A.n.*, *Aspergillus nidulans*; *A.f.*, *Aspergillus fumigatus*; *H.c.*, *Histoplasma capsulatum*; *C.n.*, *Cryptococcus neoformans*.

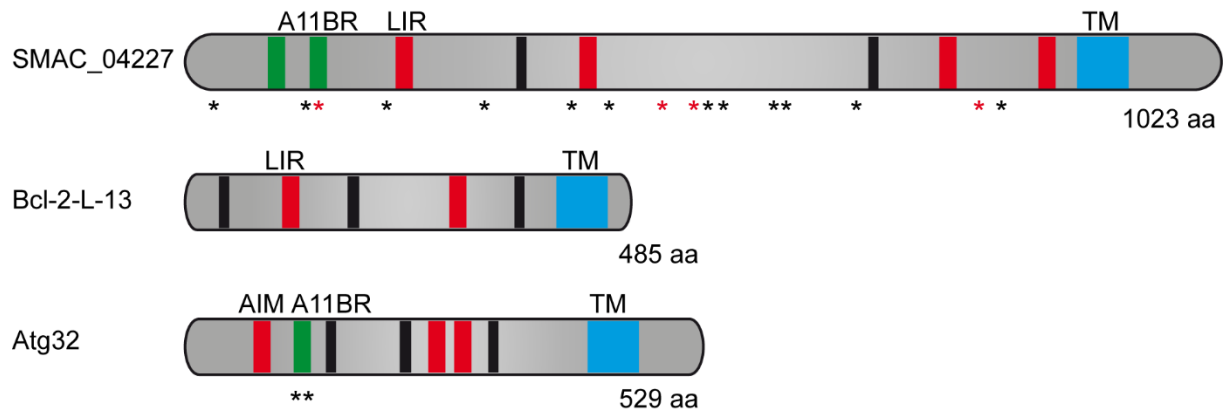

**Figure S4: Domain organization of SMAC\_04227 in *S. macrospora*, Bcl-2-L-13 in *H. sapiens* and Atg32p in *S. cerevisiae*.** Protein SMAC\_04227 was found by functional homology compared to Atg32p. Significant domains are indicated by bars: A11BR, Atg11-binding region (green), AIM, Atg8-interacting motif/ LIR, LC3-interacting region (red); amino acid acidic cluster (black); TM, transmembrane domain (blue). Phosphorylation sites in the *S. macrospora* protein are indicated by asterisks (S6, S192, S196, S234, S316, S371, S398, S415, S497, S503, S517, S567, S581, S612, S711, S732). Red stars mark differentially regulated in STRIPAK deletion mutants (S196, S415, S497, S711) (4, 5). Phosphorylation sites in *S. cerevisiae* are: S114, S119. Atg32 was adopted from and modified after Krikin et al. (2019).

**Table S1: Identification of 27 putative Atg32p homologues using eight different criteria. All predicted proteins are characterized by a C-terminal trans membrane domaine, a Casein kinase 2 phosphorylation site and a Docking site for PP2A (according to the Eukaryotic Linear Motif programme).**

| SMAC*      | (F/Y/W)XX(L/I/V)<br>Motif-LIR <sup>1,3</sup>                                                                              | acidic acid<br>clusters <sup>1</sup> (at<br>least 3 acidic<br>acids <sup>2</sup> ) | Exclusivley<br>found in<br>euascomycetes | A11BR <sup>3</sup> | WolfPsort<br>prediction                                    |
|------------|---------------------------------------------------------------------------------------------------------------------------|------------------------------------------------------------------------------------|------------------------------------------|--------------------|------------------------------------------------------------|
| SMAC_00140 | WKTL                                                                                                                      | EDD, EDE                                                                           | no                                       | SSAS               | cyto 7, mito 5,<br>nucl 4, extr 4,<br>plas 3, pero 2       |
| SMAC_00746 | WSEI, WGEI                                                                                                                | EED, DDD                                                                           | no                                       | SILS               | plas 10, nucl 7,<br>cyto 5, mito 4                         |
| SMAC_00819 | SFVKL, STFHHV<br>TFHHV, SSFTRL<br>SFTRL, DFYVL<br>DYNNL,<br>SFTWIKV,<br>TWIKV<br>SSPWTDV,<br>SPWTDV,<br>EPSFFSV<br>SFFSVV | EEE, EDD                                                                           | no                                       | STSS               | plas 21, nucl 3,<br>mito 2,<br>cyto_nucl 2                 |
| SMAC_00889 | WYKI, WYAI,<br>WNSI                                                                                                       | EEDD                                                                               | no                                       | SNSS               | cyto 9.5,<br>cyto_mito 7.5,<br>nucl 7, mito 4.5,<br>golg 3 |
| SMAC_01362 | WHSI, WWLL                                                                                                                | EEE, EEEEE,<br>DDD, DDD                                                            | no                                       | DPSS               | extr 10, cyto 6,<br>mito 4,<br>cyto_pero 4,<br>E.R. 3      |
| SMAC_02309 | WYDI                                                                                                                      | EEE                                                                                | no                                       | SSSS               | mito 10, nucl 9,<br>cyto_nucl 9, cyto<br>7                 |

|                         |                                                                       |                         |     |            |                                                                                      |
|-------------------------|-----------------------------------------------------------------------|-------------------------|-----|------------|--------------------------------------------------------------------------------------|
| SMAC_02807              | DNFLVL                                                                | DDDD                    | yes | DGSS       | cyto 7, nucl 6,<br>cyto_mito 6,<br>mito 5, plas 5                                    |
| SMAC_02823              | SWVEI                                                                 | EED, DDD                | yes | SSSS       | nucl 14, cyto 6,<br>mito 3, plas 3                                                   |
| SMAC_02891 <sup>4</sup> | WEWL, WYKI,<br>SFMNI<br>DYISL<br>TRSFLEV<br>SFLEV<br>DQSYDDL<br>SYYDL | EEE, EEE                | yes | SSLS       | cyto 14.5,<br>cyto_nucl 8,<br>mito 6, pero 2,<br>plas 1, extr 1,<br>E.R. 1, vacu 1   |
| SMAC_03631              | STHFTTI, THFTTI<br>SSVYTSI,<br>SVYTSI                                 | DDDDD,<br>EEDD          | yes | DMSS       | extr 20, mito 3,<br>cyto 2                                                           |
| SMAC_04227 <sup>5</sup> | SPSWEQI,<br>SDAFSKL,<br>SRFTSV,<br>TYVHL                              | DDEEE, DEE              | yes | SSSS, SILS | nucl 11.5,<br>cyto_nucl 9,<br>mito 6, cyto 5.5,<br>plas 1, pero 1,<br>golg 1, vacu 1 |
| SMAC_04982              | ETFTNI<br>TFTNI<br>SVFDML<br>SGYSFI                                   | DED                     | no  | SESS, SCLS | plas 14, mito 5,<br>nucl 2.5,<br>cyto_nucl 2.5,<br>pero 2, golg 2                    |
| SMAC_05201              | WLG I, WESI                                                           | EEDD, DDEE,<br>EDD, DDD | no  | DHLS       | nucl 16,<br>cyto_nucl 12.5,<br>cyto 7, mito 1,<br>pero 1, cysk 1,<br>vacu 1          |
| SMAC_05581              | WENL                                                                  | EEEE , DDD              | no  | SILS       | mito 25                                                                              |
| SMAC_05645              | DTDFTDI<br>TDFTDI<br>DFTDI<br>ELYLKL                                  | DEDEEEEE,<br>EEE, EDD   | no  | SSSS       | plas 9, mito 7,<br>E.R. 7, cyto 1.5,<br>cyto_nucl 1.5                                |

|            |            |                                                              |    |      |                                                                                              |
|------------|------------|--------------------------------------------------------------|----|------|----------------------------------------------------------------------------------------------|
| SMAC_05985 | WGSL, WENL | EED                                                          | no | STLS | mito 12, plas 5,<br>cyto 3, nucl 2,<br>pero 2, E.R. 2                                        |
| SMAC_06013 | WASL, WTIL | EED, DDDDD,<br>DDE                                           | no | SGSS | cyto 6.5, mito 6,<br>cyto_nucl 6, plas<br>5, nucl 4.5, pero<br>3                             |
| SMAC_06448 | WDEL       | EEE                                                          | no | SRSS | cyto 14,<br>cyto_nucl 10,<br>nucl 4, mito 4,<br>plas 1, extr 1,<br>pero 1, E.R. 1,<br>cysk 1 |
| SMAC_06461 | WALL, WLKL | EDE                                                          | no | SDSS | plas 16, nucl 4,<br>mito 4,<br>mito nucl 4                                                   |
| SMAC_06474 | WRAL       | EEE, DDE                                                     | no | SSLS | mito 12, cyto<br>7.5, cyto_nucl<br>6.5, nucl 4.5                                             |
| SMAC_06664 | WKPI       | DEE, EDD                                                     | no | SESS | extr 23, mito 2                                                                              |
| SMAC_06939 | WARI       | DDE                                                          | no | SVSS | extr 21, mito 2,<br>E.R. 2                                                                   |
| SMAC_07007 | WTDI, WKGL | EDEE, DDE,<br>EDD                                            | no | SKLS | plas 21, mito 4                                                                              |
| SMAC_07048 | ERGFYRV    | EEE                                                          | no | AILS | plas 21, mito 4                                                                              |
| SMAC_07073 | WWVL       | EEED EEE,<br>EEE, EEE, EEE,<br>EEE, DEE,<br>DDE, EDD,<br>EDD | no | SVSS | mito 8, cyto 6,<br>cyto_nucl 6, extr<br>5, nucl 4, E.R. 2                                    |
| SMAC_07199 | WASL WAWL  | EDD                                                          | no | SYSS | nucl 11, mito 5,<br>cyto 4, plas 2,<br>pero 2, golg 1,<br>cysk 1, vacu 1                     |



|            |                                                                             |     |     |      |                                           |
|------------|-----------------------------------------------------------------------------|-----|-----|------|-------------------------------------------|
| SMAC_08674 | ECDFCSL,<br>DDYQIL,<br>EYVALS,<br>DRFFTL,<br>SKYHTV,<br>SPEFLAV,<br>TREWIRL | DED | yes | SISS | cyto 8, nucl 7,<br>mito 7,<br>mito_nucl 7 |
|------------|-----------------------------------------------------------------------------|-----|-----|------|-------------------------------------------|

\* no homologue in *S. cerevisiae*

<sup>1</sup> Murakawa et al. 2015

<sup>2</sup> This study

<sup>3</sup> Kirkin et al. 2019

<sup>4</sup> Protein was found in the phosphoproteome, and is regulated by STRIPAK (Märker et al. 2020, Stein et al. 2020)

<sup>5</sup> Protein was found in the phosphoproteome, but is not regulated by STRIPAK (Märker et al. 2020, Stein et al. 2020)

## References

1. Pöggeler S, Kück U. 2004. A WD40 repeat protein regulates fungal cell differentiation and can be replaced functionally by the mammalian homologue striatin. *Eukaryot Cell* 3:232-40.
2. van der Voorn L, Ploegh HL. 1992. The WD-40 repeat. *FEBS Lett* 307:131-4.
3. Neer EJ, Schmidt CJ, Nambudripad R, Smith TF. 1994. The ancient regulatory-protein family of WD-repeat proteins. *Nature* 371:297-300.
4. Märker R, Blank-Landeshammer B, Beier-Rosberger A, Sickmann A, Kück U. 2020. Phosphoproteomic analysis of STRIPAK mutants identifies a conserved serine phosphorylation site in PAK kinase CLA4 to be important in fungal sexual development and polarized growth. *Mol Microbiol* 113:1053-1069.
5. Stein V, Blank-Landeshammer B, Müntjes K, Märker R, Teichert I, Feldbrügge M, Sickmann A, Kück U. 2020a. The STRIPAK signaling complex regulates dephosphorylation of GUL1, an RNA-binding protein that shuttles on endosomes. *PLoS Genet* 16:e1008819.
